# Supplementary material for: Evolutionary Processes Acting on Candidate cis-Regulatory Regions in Humans Inferred from Patterns of Polymorphism and Divergence
Source: PLOS journal article supplement (doi:10.1371/journal.pgen.1000592), 2009-08-06
Supplement: S29 (10.1371/journal.pgen.1000592.s029) [file journal.pgen.1000592.s029]

**Table S13.** Summary statistics for the log of polymorphism/divergence ratio in human-mouse conserved sequences (HMCS) versus unfiltered data.

| Data       | Min     | 1 <sup>st</sup> Quartile | Median  | Mean    | 3 <sup>rd</sup> Quartile | Max.   |
|------------|---------|--------------------------|---------|---------|--------------------------|--------|
| HMCS       | -3.1350 | -1.5040                  | -0.9808 | -1.0220 | -0.5108                  | 2.4850 |
| Unfiltered | -3.4340 | -1.6090                  | -1.0990 | -1.1040 | -0.5878                  | 2.8900 |
