# Supplementary material for: Evolutionary Processes Acting on Candidate cis-Regulatory Regions in Humans Inferred from Patterns of Polymorphism and Divergence
Source: PLOS journal article supplement (doi:10.1371/journal.pgen.1000592), 2009-08-06
Supplement: S31 (10.1371/journal.pgen.1000592.s031) [file journal.pgen.1000592.s031]

**Table S15.** Proportion of simulations with zero polymorphisms ( $p=0$ ) or zero human-chimpanzee fixed differences ( $d=0$ ) in the HMCS and unfiltered data.

| Data       | $p=0$   | $d=0$    |
|------------|---------|----------|
| HMCS       | 0.0498  | 0.0      |
| Unfiltered | 0.04996 | 0.000087 |
