# Supplementary material for: Evolutionary Processes Acting on Candidate cis-Regulatory Regions in Humans Inferred from Patterns of Polymorphism and Divergence
Source: PLoS Genet. 2009 Aug 7;5(8):e1000592. doi: 10.1371/journal.pgen.1000592 (PMC2714078; doi:10.1371/journal.pgen.1000592)
Supplement: Table S10 — GeneAtlas2 results for protein coding regions. (0.05 MB XLS) [file pgen.1000592.s026.xls]

## Sheet: AAs
category	mean_NegSel	mean_others_NS	p_NegSel	mean_PosSel	mean_others_PS	p_PosSel	Total	Total_others
PB-CD4+_Tcells	0.5319	0.5392	0.962	0.3059	0.2985	0.0119	3893	3840
PB-CD56+_NKCells	0.5323	0.5391	0.9452	0.3058	0.2984	0.01247	4019	3714
BM-CD71+_early_erythroid	0.5318	0.5385	0.9628	0.3059	0.2994	0.01494	3393	4340
PB-CD8+_Tcells	0.5323	0.5387	0.9406	0.3054	0.2992	0.0208	3840	3893
thymus	0.5321	0.5386	0.9574	0.3057	0.2992	0.02118	3626	4107
lung	0.5324	0.5386	0.9433	0.3054	0.2991	0.02288	3821	3912
whole_brain	0.5326	0.538	0.833	0.3052	0.2997	0.03352	3546	4187
BM-CD34+	0.5333	0.5384	0.873	0.3046	0.2991	0.04289	4402	3331
cerebellum	0.5333	0.5373	0.8832	0.3045	0.3005	0.04739	3406	4327
atrioventricular_node	0.5315	0.5381	0.9412	0.3056	0.3001	0.04969	2998	4735
PB-CD19+_Bcells	0.5333	0.5377	0.8204	0.3049	0.2997	0.05595	3796	3937
BM-CD105+_endothelial	0.5335	0.5375	0.8549	0.3046	0.2999	0.07046	3827	3906
prostate	0.5345	0.5366	0.824	0.3036	0.3008	0.07333	3961	3772
whole_blood	0.5336	0.5374	0.8401	0.3046	0.3	0.07364	3749	3984
adrenal_gland	0.5333	0.5374	0.8383	0.3046	0.3003	0.07696	3482	4251
ciliary_ganglion	0.532	0.5377	0.9041	0.3053	0.3004	0.07755	2907	4826
PB-BDCA4+_dendritic_cells	0.5335	0.5377	0.7918	0.3046	0.2998	0.08423	3917	3816
PB-CD14+_monocytes	0.5335	0.5374	0.7951	0.3047	0.3	0.08506	3729	4004
trigeminal_ganglion	0.5333	0.5372	0.8786	0.3039	0.301	0.09568	3279	4454
amygdala	0.5338	0.5372	0.7294	0.3043	0.3002	0.1033	3808	3925
bone_marrow	0.5344	0.5365	0.8298	0.3038	0.301	0.1205	3538	4195
temporal_lobe	0.5337	0.537	0.7294	0.3044	0.3006	0.1236	3373	4360
heart	0.5337	0.5372	0.8151	0.3042	0.3005	0.1255	3643	4090
pancreas	0.5346	0.5363	0.7806	0.3034	0.3014	0.1399	3366	4367
cingulate_cortex	0.5342	0.5367	0.6698	0.3039	0.3008	0.1578	3576	4157
BM-CD33+_myeloid	0.5341	0.537	0.7607	0.304	0.3004	0.1607	3963	3770
pituitary_gland	0.535	0.5361	0.6938	0.3031	0.3014	0.1666	3802	3931
subthalamic_nucleus	0.5342	0.5365	0.7083	0.3036	0.3012	0.1819	3254	4479
medulla_oblongata	0.5351	0.5359	0.5805	0.3035	0.3013	0.2121	3470	4263
dorsal_root_ganglion	0.5347	0.5361	0.703	0.3031	0.3016	0.2505	3113	4620
tonsil	0.5349	0.5361	0.6615	0.3035	0.3011	0.2626	3567	4166
fetal_brain	0.5352	0.5358	0.5169	0.3031	0.3014	0.2649	3763	3970
superior_cervical_ganglion	0.535	0.5359	0.7172	0.3028	0.3018	0.2968	3337	4396
hypothalamus	0.5353	0.5357	0.4577	0.3029	0.3016	0.2982	3890	3843
testis	0.5357	0.5354	0.5552	0.3022	0.3023	0.3056	3825	3908
cerebellum_peduncles	0.5362	0.535	0.445	0.3021	0.3023	0.3098	3502	4231
testis_seminiferous_tubule	0.5353	0.5358	0.5824	0.303	0.3016	0.3156	3657	4076
ovary	0.5348	0.536	0.6203	0.3034	0.3015	0.3197	2942	4791
thalamus	0.5356	0.5355	0.435	0.3029	0.3016	0.3317	3854	3879
parietal_lobe	0.5355	0.5356	0.4688	0.3029	0.3017	0.3332	3545	4188
lymph_node	0.5352	0.5359	0.5545	0.3033	0.3013	0.3481	3704	4029
liver	0.5361	0.535	0.5369	0.3021	0.3024	0.3895	3719	4014
tongue	0.536	0.5351	0.5243	0.3022	0.3023	0.4061	3444	4289
spinal_cord	0.5357	0.5354	0.3877	0.3026	0.3019	0.4073	3976	3757
adrenal_cortex	0.5355	0.5355	0.4235	0.3029	0.3017	0.4262	3502	4231
fetal_thyroid	0.5363	0.5349	0.4175	0.302	0.3024	0.4299	3672	4061
kidney	0.5369	0.5345	0.4189	0.3017	0.3027	0.4354	3427	4306
pancreatic_islets	0.5367	0.5343	0.3572	0.3018	0.3027	0.4369	3972	3761
prefrontal_cortex	0.5365	0.5345	0.3085	0.3022	0.3023	0.4412	4026	3707
occipital_lobe	0.5367	0.5345	0.2683	0.3022	0.3023	0.4456	3555	4178
skin	0.5357	0.5354	0.5223	0.3023	0.3022	0.4482	3096	4637
thyroid	0.5367	0.5341	0.3704	0.3015	0.3032	0.4554	4234	3499
fetal_liver	0.5366	0.5346	0.4934	0.3018	0.3027	0.459	3569	4164
caudate_nucleus	0.5365	0.5347	0.3301	0.3022	0.3023	0.4706	3624	4109
fetal_lung	0.5367	0.5345	0.3883	0.3019	0.3025	0.4851	3680	4053
appendix	0.5362	0.535	0.4198	0.3021	0.3024	0.5	3401	4332
uterus_corpus	0.5367	0.5346	0.4179	0.3015	0.3029	0.5232	3488	4245
olfactory_bulb	0.537	0.5343	0.3477	0.3014	0.303	0.5544	3635	4098
globus_pallidus	0.5362	0.5351	0.3439	0.3021	0.3024	0.5566	3184	4549
uterus	0.5371	0.5343	0.2891	0.3012	0.3031	0.5998	3505	4228
cardiac_myocytes	0.5373	0.5335	0.2266	0.3014	0.3033	0.6472	4161	3572
trachea	0.5378	0.5337	0.2215	0.301	0.3033	0.6533	3464	4269
testis_interstitial	0.5366	0.5347	0.3081	0.3015	0.3029	0.6798	3592	4141
smooth_muscle	0.5387	0.5326	0.1335	0.3003	0.304	0.6843	3728	4005
pons	0.5377	0.5339	0.1847	0.3012	0.3031	0.6921	3343	4390
testis_Leydig_cell	0.5371	0.5342	0.2218	0.3014	0.303	0.7095	3630	4103
testis_germ_cell	0.5372	0.5339	0.187	0.301	0.3035	0.7416	3839	3894
skeletal_muscle	0.5379	0.5337	0.2257	0.3007	0.3034	0.7475	3353	4380
adipocyte	0.539	0.5326	0.05768	0.2997	0.3045	0.8764	3597	4136
placenta	0.5389	0.5326	0.04612	0.2999	0.3043	0.8988	3648	4085
bronchial_epithelial_cells	0.5412	0.53	0.00563	0.2983	0.3061	0.9673	3828	3905
salivary_gland	0.5408	0.5316	0.01828	0.2985	0.305	0.976	3322	4411

## Sheet: EAs
category	mean_NegSel	mean_others_NS	p_NegSel	mean_PosSel	mean_others_PS	p_PosSel	Total	Total_others
PB-CD14+_monocytes	0.5868	0.5941	0.9657	0.2669	0.2603	0.01296	3652	3981
BM-CD71+_early_erythroid	0.5873	0.5932	0.931	0.2666	0.261	0.03338	3360	4273
BM-CD33+_myeloid	0.5882	0.5932	0.8877	0.2658	0.261	0.054	3891	3742
BM-CD105+_endothelial	0.588	0.5932	0.8939	0.2658	0.2611	0.06155	3777	3856
thymus	0.588	0.5929	0.8368	0.2657	0.2615	0.08603	3596	4037
PB-CD19+_Bcells	0.5887	0.5925	0.8128	0.2655	0.2615	0.0875	3736	3897
pancreas	0.5886	0.5921	0.838	0.2651	0.2622	0.1045	3331	4302
BM-CD34+	0.5892	0.5925	0.765	0.2649	0.2616	0.1287	4353	3280
heart	0.5884	0.5926	0.838	0.2656	0.2615	0.1295	3601	4032
whole_blood	0.5889	0.5922	0.7546	0.2653	0.2617	0.1315	3708	3925
PB-CD56+_NKCells	0.5888	0.5926	0.7537	0.2653	0.2614	0.1346	3967	3666
bone_marrow	0.5892	0.5918	0.7661	0.265	0.2622	0.1568	3509	4124
lung	0.5891	0.5921	0.6875	0.265	0.262	0.1707	3772	3861
PB-BDCA4+_dendritic_cells	0.5895	0.5918	0.68	0.2649	0.2619	0.1755	3868	3765
testis	0.5893	0.5919	0.7595	0.2642	0.2628	0.1792	3777	3856
PB-CD4+_Tcells	0.5893	0.5919	0.6855	0.2648	0.2621	0.2176	3856	3777
cerebellum	0.5895	0.5915	0.6041	0.2644	0.2627	0.2324	3375	4258
atrioventricular_node	0.5888	0.5918	0.712	0.2649	0.2626	0.2335	2979	4654
trigeminal_ganglion	0.5888	0.592	0.7583	0.2646	0.2626	0.258	3254	4379
ciliary_ganglion	0.589	0.5916	0.6321	0.2651	0.2625	0.2704	2898	4735
whole_brain	0.5902	0.5909	0.4588	0.2641	0.2629	0.2888	3491	4142
PB-CD8+_Tcells	0.5898	0.5914	0.6169	0.2644	0.2626	0.2928	3792	3841
adrenal_gland	0.5901	0.5911	0.5578	0.2644	0.2627	0.3111	3448	4185
tonsil	0.59	0.5911	0.5964	0.2641	0.2629	0.3491	3540	4093
lymph_node	0.5905	0.5907	0.4709	0.2641	0.2629	0.3706	3668	3965
ovary	0.5901	0.5909	0.5445	0.2642	0.263	0.3837	2925	4708
liver	0.591	0.5903	0.4757	0.2635	0.2634	0.4207	3673	3960
dorsal_root_ganglion	0.5909	0.5904	0.4699	0.2633	0.2636	0.4929	3096	4537
amygdala	0.5907	0.5905	0.3164	0.2637	0.2632	0.5053	3761	3872
testis_seminiferous_tubule	0.5906	0.5906	0.3987	0.2635	0.2634	0.5326	3612	4021
uterus_corpus	0.5918	0.5896	0.3663	0.2625	0.2642	0.5672	3449	4184
temporal_lobe	0.5917	0.5898	0.2572	0.2629	0.2639	0.5888	3337	4296
fetal_liver	0.5918	0.5896	0.2935	0.2628	0.264	0.6058	3543	4090
prostate	0.5921	0.589	0.2406	0.2627	0.2643	0.6064	3919	3714
testis_interstitial	0.5908	0.5904	0.3996	0.2633	0.2636	0.6136	3551	4082
adrenal_cortex	0.5913	0.59	0.3083	0.2633	0.2636	0.6238	3457	4176
tongue	0.5925	0.5891	0.266	0.2622	0.2645	0.669	3398	4235
superior_cervical_ganglion	0.5915	0.5899	0.3134	0.2629	0.2639	0.6788	3316	4317
spinal_cord	0.592	0.5891	0.1719	0.2626	0.2644	0.6897	3926	3707
cardiac_myocytes	0.592	0.589	0.2415	0.2626	0.2645	0.6998	4109	3524
subthalamic_nucleus	0.592	0.5896	0.174	0.2625	0.2642	0.7029	3214	4419
thalamus	0.5923	0.5889	0.1549	0.2625	0.2644	0.7093	3806	3827
testis_Leydig_cell	0.5917	0.5897	0.1797	0.2627	0.2642	0.7484	3599	4034
kidney	0.5932	0.5885	0.1472	0.2616	0.2649	0.7594	3407	4226
fetal_lung	0.5929	0.5886	0.1635	0.2619	0.2649	0.7597	3639	3994
pons	0.5925	0.5892	0.1464	0.2622	0.2644	0.7637	3318	4315
cingulate_cortex	0.5925	0.589	0.1166	0.262	0.2647	0.7863	3530	4103
parietal_lobe	0.5925	0.589	0.1056	0.2624	0.2644	0.7922	3493	4140
occipital_lobe	0.5934	0.5882	0.08089	0.2619	0.2648	0.7938	3507	4126
hypothalamus	0.5926	0.5886	0.07584	0.2622	0.2647	0.7941	3849	3784
testis_germ_cell	0.5921	0.5891	0.1618	0.2621	0.2648	0.795	3782	3851
fetal_brain	0.5923	0.589	0.09607	0.2623	0.2646	0.7977	3713	3920
cerebellum_peduncles	0.5931	0.5885	0.1016	0.2616	0.265	0.7999	3467	4166
trachea	0.5934	0.5884	0.1319	0.2614	0.2651	0.8028	3425	4208
prefrontal_cortex	0.5926	0.5884	0.07884	0.2623	0.2648	0.8102	3967	3666
skin	0.5933	0.5888	0.1601	0.2616	0.2647	0.8272	3063	4570
olfactory_bulb	0.5931	0.5884	0.09988	0.2619	0.2649	0.832	3604	4029
medulla_oblongata	0.5931	0.5886	0.07895	0.2618	0.2648	0.838	3435	4198
pancreatic_islets	0.5936	0.5875	0.09062	0.2615	0.2656	0.84	3915	3718
skeletal_muscle	0.5936	0.5883	0.1166	0.2614	0.265	0.84	3312	4321
thyroid	0.5936	0.5871	0.0954	0.2613	0.266	0.8491	4170	3463
globus_pallidus	0.5933	0.5887	0.0934	0.2615	0.2648	0.8598	3144	4489
caudate_nucleus	0.5932	0.5883	0.05667	0.2617	0.265	0.8723	3581	4052
pituitary_gland	0.5933	0.5879	0.07962	0.2614	0.2654	0.8723	3778	3855
appendix	0.5929	0.5888	0.1235	0.2619	0.2647	0.8783	3367	4266
fetal_thyroid	0.594	0.5875	0.03529	0.2611	0.2656	0.942	3625	4008
uterus	0.5943	0.5876	0.03335	0.2609	0.2656	0.9439	3467	4166
smooth_muscle	0.5954	0.5861	0.01303	0.26	0.2667	0.9629	3687	3946
placenta	0.5948	0.5868	0.01263	0.2605	0.2662	0.9643	3612	4021
salivary_gland	0.5952	0.5872	0.02055	0.2602	0.2659	0.9655	3287	4346
adipocyte	0.5954	0.5865	0.005714	0.2599	0.2665	0.9817	3551	4082
bronchial_epithelial_cells	0.5964	0.5849	0.00411	0.2592	0.2677	0.984	3795	3838
