# Supplementary material for: Evolutionary Processes Acting on Candidate cis-Regulatory Regions in Humans Inferred from Patterns of Polymorphism and Divergence
Source: PLoS Genet. 2009 Aug 7;5(8):e1000592. doi: 10.1371/journal.pgen.1000592 (PMC2714078; doi:10.1371/journal.pgen.1000592)
Supplement: Table S12 — Gene Ontology data for nonsynonymous sites. (0.12 MB XLS) [file pgen.1000592.s028.xls]

## Sheet: AA_PS
CELL
GOterm	p-value	q-value	description	Nwithterm	mean_withterm	Nwoutterm	mean_without
GO:0043226	0.945	0.9855	organelle	205	0.286176	3873	0.304397
GO:0005856	0.9638	0.9855	cytoskeleton	281	0.290615	3797	0.304433
GO:0005622	0.04903	0.93157	intracellular	786	0.310631	3292	0.301773
GO:0005794	0.7054	0.9855	Golgi apparatus	103	0.29516	3975	0.303696
GO:0005783	0.9666	0.9855	endoplasmic reticulum	211	0.285582	3867	0.304457
GO:0031090	0.4343	0.9855	organelle membrane	189	0.30555	3889	0.30338
GO:0005840	0.654	0.9855	ribosome	44	0.288548	4034	0.303644
GO:0005886	0.4179	0.9855	plasma membrane	488	0.305287	3590	0.303235
GO:0005623	0.5298	0.9855	cell	1755	0.302676	2323	0.304089
GO:0005615	0.5739	0.9855	extracellular space	128	0.297052	3950	0.303689
GO:0005634	0.1009	0.95855	nucleus	1268	0.308693	2810	0.301129
GO:0045202	0.156	0.9855	synapse	38	0.326863	4040	0.303261
GO:0043234	0.9855	0.9855	protein complex	384	0.289836	3694	0.304899
GO:0005829	0.5359	0.9855	cytosol	96	0.301133	3982	0.303537
GO:0005739	0.9001	0.9855	mitochondrion	229	0.286807	3849	0.304473
GO:0005578	0.9057	0.9855	proteinaceous extracellular matrix	91	0.28648	3987	0.303869
GO:0005737	0.63	0.9855	cytoplasm	642	0.302306	3436	0.3037
GO:0005576	0.366	0.9855	extracellular region	196	0.306581	3882	0.303324
GO:0005635	0.3114	0.9855	nuclear envelope	43	0.309812	4035	0.303413
MOL
GOterm	p-value	q-value	description	Nwithterm	mean_withterm	Nwoutterm	mean_without
GO:0019899	0.5537	0.9938	enzyme binding	87	0.29602	4489	0.30249
GO:0015075	0.7914	0.9938	ion transporter activity	220	0.291673	4356	0.302907
GO:0003779	0.9938	0.9938	actin binding	81	0.260851	4495	0.303115
GO:0043167	0.3948	0.9938	ion binding	1080	0.304388	3496	0.301743
GO:0005386	0.1941	0.71817	carrier activity	98	0.311308	4478	0.302172
GO:0008289	0.907	0.9938	lipid binding	125	0.284632	4451	0.302865
GO:0004872	0.01168	0.21608	receptor activity	457	0.32178	4119	0.300213
GO:0008134	0.2333	0.784736	transcription factor binding	99	0.310129	4477	0.302196
GO:0005488	0.552	0.9938	binding	253	0.302915	4323	0.302335
GO:0016740	0.161	0.71817	transferase activity	543	0.30619	4033	0.301853
GO:0003824	0.1702	0.71817	catalytic activity	117	0.31612	4459	0.302006
GO:0030234	0.1262	0.71817	enzyme regulator activity	241	0.311924	4335	0.301836
GO:0005102	0.7561	0.9938	receptor binding	199	0.296243	4377	0.302646
GO:0003677	0.02822	0.261035	DNA binding	485	0.315998	4091	0.300751
GO:0003700	0.009635	0.21608	transcription factor activity	230	0.329478	4346	0.300933
GO:0015267	0.9772	0.9938	channel or pore class transporter activity	121	0.273322	4455	0.303156
GO:0005509	0.9899	0.9938	calcium ion binding	300	0.28496	4276	0.303589
GO:0008092	0.5336	0.9938	cytoskeletal protein binding	45	0.304978	4531	0.302341
GO:0043492	0.9225	0.9938	ATPase activity, coupled to movement of substances	30	0.260957	4546	0.302641
GO:0003676	0.9128	0.9938	nucleic acid binding	171	0.291142	4405	0.302803
GO:0004871	0.8563	0.9938	signal transducer activity	132	0.286385	4444	0.302842
GO:0005515	0.2633	0.811842	protein binding	1463	0.304221	3113	0.301496
GO:0016874	0.02756	0.261035	ligase activity	128	0.321717	4448	0.30181
GO:0005215	0.6041	0.9938	transporter activity	167	0.297359	4409	0.302557
GO:0048037	0.5127	0.9938	cofactor binding	41	0.299485	4535	0.302393
GO:0003774	0.9218	0.9938	motor activity	45	0.270609	4531	0.302683
GO:0030528	0.3129	0.890562	transcription regulator activity	192	0.307322	4384	0.30215
GO:0016491	0.986	0.9938	oxidoreductase activity	222	0.280733	4354	0.30347
GO:0016787	0.9407	0.9938	hydrolase activity	451	0.290129	4125	0.303705
GO:0005198	0.987	0.9938	structural molecule activity	166	0.276272	4410	0.30335
GO:0003682	0.6154	0.9938	chromatin binding	16	0.305644	4560	0.302356
GO:0009055	0.1654	0.71817	electron carrier activity	29	0.320376	4547	0.302252
GO:0000166	0.7081	0.9938	nucleotide binding	598	0.298496	3978	0.302949
GO:0030246	0.1806	0.71817	carbohydrate binding	100	0.32259	4476	0.301915
GO:0003723	0.4756	0.9938	RNA binding	156	0.300069	4420	0.302448
GO:0016829	0.7363	0.9938	lyase activity	51	0.290037	4525	0.302506
GO:0008233	0.892	0.9938	peptidase activity	195	0.291028	4381	0.302872
BIO
GOterm	p-value	q-value	description	Nwithterm	mean_withterm	Nwoutterm	mean_without
GO:0006139	0.2051	0.9888	nucleobase, nucleoside, nucleotide and nucleic acid metabolic process	237	0.306045	3806	0.303875
GO:0051301	0.4727	0.9888	cell division	70	0.306856	3973	0.303952
GO:0008152	0.6523	0.9888	metabolic process	175	0.297231	3868	0.304308
GO:0006996	0.3541	0.9888	organelle organization and biogenesis	303	0.31044	3740	0.303481
GO:0007420	0.3091	0.9888	brain development	31	0.328423	4012	0.303813
GO:0032989	0.9803	0.9888	cellular structure morphogenesis	70	0.270821	3973	0.304587
GO:0019538	0.7816	0.9888	protein metabolic process	156	0.291535	3887	0.304503
GO:0016049	0.8514	0.9888	cell growth	45	0.281516	3998	0.304255
GO:0006811	0.6815	0.9888	ion transport	233	0.299037	3810	0.304306
GO:0007165	0.3066	0.9888	signal transduction	902	0.306846	3141	0.303185
GO:0003006	0.3148	0.9888	reproductive developmental process	46	0.3296	3997	0.303708
GO:0007154	0.9888	0.9888	cell communication	35	0.249734	4008	0.304476
GO:0006936	0.9006	0.9888	muscle contraction	32	0.264947	4011	0.304314
GO:0016043	0.7754	0.9888	cellular component organization and biogenesis	212	0.296937	3831	0.304393
GO:0008219	0.1702	0.9888	cell death	214	0.31755	3829	0.303245
GO:0009605	0.1496	0.9888	response to external stimulus	150	0.316679	3893	0.303514
GO:0009607	0.64	0.9888	response to biotic stimulus	77	0.300551	3966	0.304069
GO:0006412	0.5574	0.9888	translation	118	0.301383	3925	0.304081
GO:0015031	0.9173	0.9888	protein transport	202	0.290166	3841	0.30473
GO:0050789	0.8393	0.9888	regulation of biological process	103	0.287801	3940	0.304426
GO:0022613	0.8344	0.9888	ribonucleoprotein complex biogenesis and assembly	46	0.276883	3997	0.304314
GO:0007275	0.8249	0.9888	multicellular organismal development	256	0.296877	3787	0.304484
GO:0019725	0.938	0.9888	cell homeostasis	67	0.278542	3976	0.304431
GO:0007267	0.4752	0.9888	cell-cell signaling	150	0.306879	3893	0.303891
GO:0009056	0.9761	0.9888	catabolic process	173	0.28078	3870	0.30504
GO:0007049	0.2115	0.9888	cell cycle	237	0.313556	3806	0.303407
GO:0016192	0.8131	0.9888	vesicle-mediated transport	123	0.293793	3920	0.304322
GO:0019222	0.7247	0.9888	regulation of metabolic process	99	0.298594	3944	0.304138
GO:0048666	0.7235	0.9888	neuron development	36	0.297067	4007	0.304064
GO:0006519	0.6141	0.9888	amino acid and derivative metabolic process	85	0.296816	3958	0.304156
GO:0045893	0.8152	0.9888	positive regulation of transcription, DNA-dependent	49	0.288957	3994	0.304187
GO:0007399	0.9355	0.9888	nervous system development	156	0.292372	3887	0.304469
GO:0006869	0.1281	0.9888	lipid transport	32	0.325537	4011	0.30383
GO:0009790	0.7556	0.9888	embryonic development	61	0.298369	3982	0.304088
GO:0006629	0.7903	0.9888	lipid metabolic process	210	0.293036	3833	0.304603
GO:0006464	0.2078	0.9888	protein modification	498	0.31063	3545	0.303071
GO:0009058	0.6067	0.9888	biosynthetic process	267	0.301622	3776	0.30417
GO:0040008	0.8272	0.9888	regulation of growth	45	0.283484	3998	0.304233
GO:0048518	0.6052	0.9888	positive regulation of biological process	241	0.30304	3802	0.304063
GO:0008283	0.0425	0.87894	cell proliferation	170	0.318969	3873	0.303345
GO:0050794	0.06986	0.9888	regulation of cellular process	538	0.314463	3505	0.302396
GO:0046907	0.9347	0.9888	intracellular transport	189	0.290267	3854	0.304676
GO:0007283	0.1297	0.9888	spermatogenesis	75	0.326687	3968	0.303573
GO:0006950	0.616	0.9888	response to stress	261	0.299583	3782	0.304307
GO:0050896	0.2487	0.9888	response to stimulus	248	0.312496	3795	0.303447
GO:0048519	0.4152	0.9888	negative regulation of biological process	255	0.307095	3788	0.303794
GO:0032501	0.4832	0.9888	multicellular organismal process	158	0.300551	3885	0.304143
GO:0006508	0.8777	0.9888	proteolysis	220	0.294375	3823	0.304556
GO:0006091	0.9587	0.9888	generation of precursor metabolites and energy	225	0.2868	3818	0.305016
GO:0002376	0.04883	0.87894	immune system process	214	0.320015	3829	0.303107
GO:0006952	0.2982	0.9888	defense response	132	0.313364	3911	0.303686
GO:0005975	0.5109	0.9888	carbohydrate metabolic process	149	0.303096	3894	0.304037
GO:0006259	0.8775	0.9888	DNA metabolic process	195	0.292962	3848	0.304562
GO:0007155	0.3349	0.9888	cell adhesion	229	0.311631	3814	0.303544
GO:0006457	0.4854	0.9888	protein folding	77	0.297731	3966	0.304124
GO:0048731	0.9076	0.9888	system development	273	0.295589	3770	0.304611
GO:0044237	0.9207	0.9888	cellular metabolic process	358	0.29088	3685	0.305277
GO:0045892	0.2193	0.9888	negative regulation of transcription, DNA-dependent	52	0.317552	3991	0.303826
GO:0030154	0.9605	0.9888	cell differentiation	370	0.293692	3673	0.305041
GO:0000003	0.566	0.9888	reproduction	67	0.304382	3976	0.303996
GO:0006810	0.7115	0.9888	transport	228	0.295007	3815	0.30454
GO:0016310	0.334	0.9888	phosphorylation	212	0.308859	3831	0.303733
GO:0009653	0.8412	0.9888	anatomical structure morphogenesis	144	0.297394	3899	0.304246
GO:0007610	0.3677	0.9888	behavior	71	0.310546	3972	0.303885
GO:0051674	0.7283	0.9888	localization of cell	76	0.294513	3967	0.304184
GO:0050877	0.2056	0.9888	neurological process	223	0.314356	3820	0.303398
GO:0043473	0.2913	0.9888	pigmentation	9	0.316056	4034	0.303975
GO:0009719	0.9385	0.9888	response to endogenous stimulus	99	0.284504	3944	0.304492
GO:0006350	0.001101	0.079272	transcription	473	0.327149	3570	0.300935
GO:0043062	0.4603	0.9888	extracellular structure organization and biogenesis	26	0.308531	4017	0.303973
GO:0009628	0.5621	0.9888	response to abiotic stimulus	38	0.309476	4005	0.30395
GO:0045449	0.02693	0.87894	regulation of transcription	618	0.31684	3425	0.301686

## Sheet: AA_NS
CELL
GOterm	p-value	q-value	description	Nwithterm	mean_withterm	Nwoutterm	mean_without
GO:0043226	0.07228	0.29773	organelle	205	0.553888	3873	0.533038
GO:0005856	0.05966	0.29773	cytoskeleton	281	0.549984	3797	0.532909
GO:0005622	0.9554	0.9554	intracellular	786	0.525711	3292	0.536085
GO:0005794	0.2429	0.656687	Golgi apparatus	103	0.545075	3975	0.533801
GO:0005783	0.04435	0.29773	endoplasmic reticulum	211	0.552849	3867	0.533062
GO:0031090	0.5247	0.720371	organelle membrane	189	0.532482	3889	0.534164
GO:0005840	0.2765	0.656687	ribosome	44	0.549348	4034	0.533919
GO:0005886	0.6282	0.79572	plasma membrane	488	0.531473	3590	0.534441
GO:0005623	0.4931	0.720371	cell	1755	0.534487	2323	0.533782
GO:0005615	0.3252	0.686533	extracellular space	128	0.54072	3950	0.533871
GO:0005634	0.8692	0.917489	nucleus	1268	0.528442	2810	0.536632
GO:0045202	0.8507	0.917489	synapse	38	0.50125	4040	0.534395
GO:0043234	0.01147	0.21793	protein complex	384	0.551593	3694	0.532266
GO:0005829	0.4028	0.695746	cytosol	96	0.534929	3982	0.534065
GO:0005739	0.07835	0.29773	mitochondrion	229	0.551074	3849	0.533075
GO:0005578	0.1733	0.548783	proteinaceous extracellular matrix	91	0.55736	3987	0.533554
GO:0005737	0.3658	0.69502	cytoplasm	642	0.535513	3436	0.533819
GO:0005576	0.5308	0.720371	extracellular region	196	0.530998	3882	0.534242
GO:0005635	0.6815	0.809281	nuclear envelope	43	0.520091	4035	0.534235
MOL
GOterm	p-value	q-value	description	Nwithterm	mean_withterm	Nwoutterm	mean_without
GO:0019899	0.5146	0.864835	enzyme binding	87	0.542646	4489	0.535625
GO:0015075	0.1734	0.458271	ion transporter activity	220	0.549204	4356	0.535079
GO:0003779	0.008026	0.249287	actin binding	81	0.584494	4495	0.53488
GO:0043167	0.6018	0.927775	ion binding	1080	0.533153	3496	0.536563
GO:0005386	0.7692	0.992197	carrier activity	98	0.523939	4478	0.536017
GO:0008289	0.06687	0.353456	lipid binding	125	0.56037	4451	0.535067
GO:0004872	0.9932	0.9932	receptor activity	457	0.514594	4119	0.538107
GO:0008134	0.7205	0.987352	transcription factor binding	99	0.529448	4477	0.535898
GO:0005488	0.4023	0.757575	binding	253	0.537142	4323	0.535677
GO:0016740	0.8265	0.992197	transferase activity	543	0.531794	4033	0.536292
GO:0003824	0.8109	0.992197	catalytic activity	117	0.523791	4459	0.536072
GO:0030234	0.917	0.9932	enzyme regulator activity	241	0.522141	4335	0.536515
GO:0005102	0.1495	0.4255	receptor binding	199	0.542128	4377	0.535469
GO:0003677	0.976	0.9932	DNA binding	485	0.519399	4091	0.537698
GO:0003700	0.9837	0.9932	transcription factor activity	230	0.506384	4346	0.537313
GO:0015267	0.01789	0.249287	channel or pore class transporter activity	121	0.572113	4455	0.534771
GO:0005509	0.0342	0.25308	calcium ion binding	300	0.557032	4276	0.534266
GO:0008092	0.4095	0.757575	cytoskeletal protein binding	45	0.535909	4531	0.535757
GO:0043492	0.09218	0.378962	ATPase activity, coupled to movement of substances	30	0.592497	4546	0.535384
GO:0003676	0.08737	0.378962	nucleic acid binding	171	0.547655	4405	0.535297
GO:0004871	0.1027	0.37999	signal transducer activity	132	0.555147	4444	0.535182
GO:0005515	0.7161	0.987352	protein binding	1463	0.533734	3113	0.53671
GO:0016874	0.9628	0.9932	ligase activity	128	0.511953	4448	0.536443
GO:0005215	0.3249	0.707135	transporter activity	167	0.539643	4409	0.535611
GO:0048037	0.5376	0.864835	cofactor binding	41	0.536927	4535	0.535748
GO:0003774	0.1174	0.388808	motor activity	45	0.5714	4531	0.535404
GO:0030528	0.6327	0.936396	transcription regulator activity	192	0.530689	4384	0.53598
GO:0016491	0.02066	0.249287	oxidoreductase activity	222	0.560655	4354	0.534489
GO:0016787	0.06588	0.353456	hydrolase activity	451	0.551321	4125	0.534057
GO:0005198	0.02695	0.249287	structural molecule activity	166	0.562873	4410	0.534738
GO:0003682	0.3171	0.707135	chromatin binding	16	0.536169	4560	0.535757
GO:0009055	0.8313	0.992197	electron carrier activity	29	0.510521	4547	0.535919
GO:0000166	0.3563	0.732394	nucleotide binding	598	0.541038	3978	0.534965
GO:0030246	0.8638	0.9932	carbohydrate binding	100	0.50827	4476	0.536372
GO:0003723	0.4595	0.809595	RNA binding	156	0.539646	4420	0.535621
GO:0016829	0.2595	0.6401	lyase activity	51	0.549212	4525	0.535607
GO:0008233	0.1261	0.388808	peptidase activity	195	0.548199	4381	0.535205
BIO
GOterm	p-value	q-value	description	Nwithterm	mean_withterm	Nwoutterm	mean_without
GO:0022613	0.1287	0.550286	ribonucleoprotein complex biogenesis and assembly	46	0.564978	3997	0.53309
GO:0051674	0.2504	0.6012	localization of cell	76	0.547024	3967	0.533193
GO:0007420	0.7084	0.90768	brain development	31	0.508903	4012	0.533642
GO:0048666	0.2435	0.6012	neuron development	36	0.541775	4007	0.533378
GO:0032989	0.01473	0.44808	cellular structure morphogenesis	70	0.575944	3973	0.532704
GO:0009058	0.3334	0.699	biosynthetic process	267	0.537024	3776	0.5332
GO:0044237	0.07361	0.529992	cellular metabolic process	358	0.549027	3685	0.53194
GO:0050877	0.8228	0.9297	neurological process	223	0.52398	3820	0.534006
GO:0015031	0.04472	0.5156	protein transport	202	0.549652	3841	0.532601
GO:0009607	0.3495	0.699	response to biotic stimulus	77	0.535351	3966	0.533416
GO:0006519	0.3796	0.70794	amino acid and derivative metabolic process	85	0.543249	3958	0.533242
GO:0007610	0.5834	0.8751	behavior	71	0.528454	3972	0.533542
GO:0006457	0.4792	0.802381	protein folding	77	0.539021	3966	0.533345
GO:0009605	0.8264	0.9297	response to external stimulus	150	0.518718	3893	0.53402
GO:0008152	0.3414	0.699	metabolic process	175	0.53932	3868	0.533187
GO:0007165	0.6675	0.90768	signal transduction	902	0.530778	3141	0.534221
GO:0007154	0.009668	0.44808	cell communication	35	0.603349	4008	0.532842
GO:0006091	0.04342	0.5156	generation of precursor metabolites and energy	225	0.555083	3818	0.532178
GO:0009719	0.08136	0.532538	response to endogenous stimulus	99	0.559271	3944	0.532805
GO:0007155	0.8495	0.940985	cell adhesion	229	0.524017	3814	0.534019
GO:0019538	0.2134	0.6012	protein metabolic process	156	0.549001	3887	0.532829
GO:0009790	0.2316	0.6012	embryonic development	61	0.543543	3982	0.533298
GO:0006412	0.3719	0.70794	translation	118	0.537085	3925	0.533343
GO:0006629	0.1933	0.5799	lipid metabolic process	210	0.546086	3833	0.532761
GO:0007399	0.06445	0.5156	nervous system development	156	0.548171	3887	0.532862
GO:0003006	0.7233	0.90768	reproductive developmental process	46	0.511467	3997	0.533706
GO:0006869	0.8696	0.948654	lipid transport	32	0.508916	4011	0.533648
GO:0016049	0.1336	0.550286	cell growth	45	0.560376	3998	0.53315
GO:0045893	0.1834	0.574122	positive regulation of transcription, DNA-dependent	49	0.549173	3994	0.53326
GO:0019725	0.05803	0.5156	cell homeostasis	67	0.565366	3976	0.532915
GO:0005975	0.3933	0.70794	carbohydrate metabolic process	149	0.53946	3894	0.533223
GO:0032501	0.562	0.860936	multicellular organismal process	158	0.533965	3885	0.533432
GO:0006810	0.2505	0.6012	transport	228	0.544134	3815	0.532814
GO:0050789	0.1505	0.550286	regulation of biological process	103	0.550481	3940	0.533008
GO:0007267	0.4962	0.811964	cell-cell signaling	150	0.530057	3893	0.533583
GO:0019222	0.23	0.6012	regulation of metabolic process	99	0.543878	3944	0.533191
GO:0006464	0.7771	0.917233	protein modification	498	0.526526	3545	0.534426
GO:0051301	0.5546	0.860936	cell division	70	0.533014	3973	0.53346
GO:0006952	0.7276	0.90768	defense response	132	0.52269	3911	0.533816
GO:0050794	0.9102	0.963741	regulation of cellular process	538	0.522984	3505	0.53506
GO:0000003	0.4314	0.743314	reproduction	67	0.531015	3976	0.533494
GO:0016043	0.2872	0.667045	cellular component organization and biogenesis	212	0.539531	3831	0.533116
GO:0016310	0.7196	0.90768	phosphorylation	212	0.528026	3831	0.533753
GO:0046907	0.05067	0.5156	intracellular transport	189	0.549871	3854	0.532648
GO:0040008	0.1605	0.550286	regulation of growth	45	0.558271	3998	0.533173
GO:0006259	0.1559	0.550286	DNA metabolic process	195	0.548746	3848	0.532678
GO:0009628	0.4336	0.743314	response to abiotic stimulus	38	0.530626	4005	0.533479
GO:0048519	0.5452	0.860936	negative regulation of biological process	255	0.52982	3788	0.533697
GO:0050896	0.7517	0.90768	response to stimulus	248	0.523643	3795	0.534094
GO:0045892	0.7261	0.90768	negative regulation of transcription, DNA-dependent	52	0.518633	3991	0.533646
GO:0009653	0.1455	0.550286	anatomical structure morphogenesis	144	0.543844	3899	0.533069
GO:0030154	0.03566	0.5156	cell differentiation	370	0.546372	3673	0.532151
GO:0006936	0.1177	0.550286	muscle contraction	32	0.58675	4011	0.533027
GO:0006139	0.6773	0.90768	nucleobase, nucleoside, nucleotide and nucleic acid metabolic process	237	0.530495	3806	0.533637
GO:0043062	0.6771	0.90768	extracellular structure organization and biogenesis	26	0.519331	4017	0.533544
GO:0006508	0.1231	0.550286	proteolysis	220	0.544024	3823	0.532844
GO:0006350	0.999	0.999	transcription	473	0.507163	3570	0.536936
GO:0007275	0.1603	0.550286	multicellular organismal development	256	0.542772	3787	0.532823
GO:0045449	0.9758	0.989544	regulation of transcription	618	0.51845	3425	0.53616
GO:0006950	0.3865	0.70794	response to stress	261	0.538275	3782	0.53312
GO:0048731	0.1015	0.550286	system development	273	0.544326	3770	0.532665
GO:0007283	0.888	0.954269	spermatogenesis	75	0.507373	3968	0.533946
GO:0016192	0.1739	0.569127	vesicle-mediated transport	123	0.544551	3920	0.533104
GO:0002376	0.9331	0.97367	immune system process	214	0.514199	3829	0.534529
GO:0008283	0.9482	0.975291	cell proliferation	170	0.515066	3873	0.53426
GO:0048518	0.3487	0.699	positive regulation of biological process	241	0.536759	3802	0.533243
GO:0008219	0.8236	0.9297	cell death	214	0.519927	3829	0.534209
GO:0006996	0.6945	0.90768	organelle organization and biogenesis	303	0.528358	3740	0.533865
GO:0006811	0.312	0.699	ion transport	233	0.538498	3810	0.533144
GO:0043473	0.7485	0.90768	pigmentation	9	0.519667	4034	0.533483
GO:0009056	0.01867	0.44808	catabolic process	173	0.563064	3870	0.532129
GO:0007049	0.7564	0.90768	cell cycle	237	0.524386	3806	0.534017

## Sheet: EA_PS
CELL
GOterm	p-value	q-value	description	Nwithterm	mean_withterm	Nwoutterm	mean_without
GO:0043226	0.5745	0.909625	organelle	204	0.2639	3846	0.265098
GO:0005856	0.9674	0.9823	cytoskeleton	279	0.254211	3771	0.265839
GO:0005622	0.5617	0.909625	intracellular	781	0.265191	3269	0.265001
GO:0005794	0.5186	0.909625	Golgi apparatus	101	0.26257	3949	0.265101
GO:0005783	0.7346	0.930493	endoplasmic reticulum	205	0.259135	3845	0.265352
GO:0031090	0.1329	0.6441	organelle membrane	183	0.275544	3867	0.264541
GO:0005840	0.7242	0.930493	ribosome	45	0.249271	4005	0.265215
GO:0005886	0.3461	0.909625	plasma membrane	494	0.268293	3556	0.264586
GO:0005623	0.5508	0.909625	cell	1763	0.263913	2287	0.265905
GO:0005615	0.3682	0.909625	extracellular space	121	0.261247	3929	0.265154
GO:0005634	0.1356	0.6441	nucleus	1250	0.270103	2800	0.262776
GO:0045202	0.7066	0.930493	synapse	38	0.249745	4012	0.265183
GO:0043234	0.8924	0.9823	protein complex	371	0.258497	3679	0.265697
GO:0005829	0.9823	0.9823	cytosol	103	0.240215	3947	0.265685
GO:0005739	0.5178	0.909625	mitochondrion	224	0.258918	3826	0.265396
GO:0005578	0.9263	0.9823	proteinaceous extracellular matrix	90	0.252191	3960	0.26533
GO:0005737	0.05196	0.49362	cytoplasm	635	0.274303	3415	0.263315
GO:0005576	0.03878	0.49362	extracellular region	186	0.278064	3864	0.264411
GO:0005635	0.3848	0.909625	nuclear envelope	40	0.270342	4010	0.264985
MOL
GOterm	p-value	q-value	description	Nwithterm	mean_withterm	Nwoutterm	mean_without
GO:0019899	0.2302	0.998	enzyme binding	83	0.27534	4457	0.265148
GO:0015075	0.7273	0.998	ion transporter activity	218	0.259322	4322	0.265638
GO:0003779	0.8767	0.998	actin binding	76	0.243891	4464	0.2657
GO:0043167	0.3938	0.998	ion binding	1069	0.266978	3471	0.264828
GO:0005386	0.1242	0.91908	carrier activity	100	0.275005	4440	0.265117
GO:0008289	0.8071	0.998	lipid binding	121	0.253276	4419	0.265665
GO:0004872	0.03743	0.461637	receptor activity	452	0.280896	4088	0.263614
GO:0008134	0.1899	0.998	transcription factor binding	99	0.277427	4441	0.265065
GO:0005488	0.4748	0.998	binding	247	0.264244	4293	0.265397
GO:0016740	0.6038	0.998	transferase activity	536	0.263288	4004	0.265609
GO:0003824	0.4943	0.998	catalytic activity	121	0.26501	4419	0.265343
GO:0030234	0.625	0.998	enzyme regulator activity	242	0.261708	4298	0.265539
GO:0005102	0.4354	0.998	receptor binding	194	0.266412	4346	0.265286
GO:0003677	0.1045	0.91908	DNA binding	481	0.276563	4059	0.264004
GO:0003700	0.007156	0.210345	transcription factor activity	230	0.286318	4310	0.264215
GO:0015267	0.9695	0.998	channel or pore class transporter activity	119	0.244157	4421	0.265905
GO:0005509	0.998	0.998	calcium ion binding	311	0.248816	4229	0.266549
GO:0008092	0.8089	0.998	cytoskeletal protein binding	45	0.251776	4495	0.26547
GO:0043492	0.7226	0.998	ATPase activity, coupled to movement of substances	31	0.245306	4509	0.265472
GO:0003676	0.8167	0.998	nucleic acid binding	166	0.254545	4374	0.265744
GO:0004871	0.9171	0.998	signal transducer activity	126	0.246471	4414	0.265873
GO:0005515	0.5495	0.998	protein binding	1457	0.265419	3083	0.265294
GO:0016874	0.6844	0.998	ligase activity	131	0.257921	4409	0.265555
GO:0005215	0.2887	0.998	transporter activity	163	0.264682	4377	0.265359
GO:0048037	0.6031	0.998	cofactor binding	41	0.257385	4499	0.265407
GO:0003774	0.8844	0.998	motor activity	45	0.251002	4495	0.265478
GO:0030528	0.3898	0.998	transcription regulator activity	191	0.27109	4349	0.265082
GO:0016491	0.9579	0.998	oxidoreductase activity	220	0.249476	4320	0.266142
GO:0016787	0.9638	0.998	hydrolase activity	458	0.252165	4082	0.266812
GO:0005198	0.8328	0.998	structural molecule activity	164	0.252218	4376	0.265826
GO:0003682	0.8253	0.998	chromatin binding	17	0.247788	4523	0.265401
GO:0009055	0.3571	0.998	electron carrier activity	28	0.26795	4512	0.265318
GO:0000166	0.983	0.998	nucleotide binding	597	0.255997	3943	0.266748
GO:0030246	0.01137	0.210345	carbohydrate binding	99	0.299026	4441	0.264584
GO:0003723	0.5443	0.998	RNA binding	157	0.266426	4383	0.265295
GO:0016829	0.254	0.998	lyase activity	52	0.275421	4488	0.265218
GO:0008233	0.8	0.998	peptidase activity	199	0.259087	4341	0.265621
BIO
GOterm	p-value	q-value	description	Nwithterm	mean_withterm	Nwoutterm	mean_without
GO:0006139	0.8746	0.9954	nucleobase, nucleoside, nucleotide and nucleic acid metabolic process	238	0.252425	3793	0.265122
GO:0051301	0.5548	0.876835	cell division	69	0.260823	3962	0.264434
GO:0008152	0.4003	0.8024	metabolic process	175	0.263814	3856	0.264398
GO:0006996	0.356	0.759388	organelle organization and biogenesis	300	0.273434	3731	0.263644
GO:0007420	0.2202	0.634176	brain development	28	0.299286	4003	0.264128
GO:0032989	0.4012	0.8024	cellular structure morphogenesis	67	0.272887	3964	0.264229
GO:0019538	0.7576	0.977914	protein metabolic process	152	0.255909	3879	0.264704
GO:0016049	0.7877	0.988759	cell growth	44	0.258025	3987	0.264443
GO:0006811	0.2958	0.70992	ion transport	232	0.267268	3799	0.264196
GO:0007165	0.4756	0.876835	signal transduction	895	0.266092	3136	0.263882
GO:0003006	0.3256	0.756232	reproductive developmental process	44	0.288393	3987	0.264107
GO:0007154	0.9589	0.9954	cell communication	34	0.231229	3997	0.264654
GO:0006936	0.5004	0.876835	muscle contraction	32	0.257113	3999	0.264431
GO:0016043	0.5932	0.9072	cellular component organization and biogenesis	211	0.263814	3820	0.264403
GO:0008219	0.03589	0.279	cell death	208	0.283314	3823	0.263342
GO:0009605	0.007031	0.0723189	response to external stimulus	149	0.290746	3882	0.26336
GO:0009607	0.2843	0.705848	response to biotic stimulus	75	0.272352	3956	0.264221
GO:0006412	0.5474	0.876835	translation	118	0.263997	3913	0.264384
GO:0015031	0.5525	0.876835	protein transport	195	0.264772	3836	0.264352
GO:0050789	0.2432	0.673477	regulation of biological process	105	0.269898	3926	0.264225
GO:0022613	0.691	0.952302	ribonucleoprotein complex biogenesis and assembly	43	0.251693	3988	0.264509
GO:0007275	0.7965	0.988759	multicellular organismal development	247	0.258962	3784	0.264726
GO:0019725	0.7529	0.977914	cell homeostasis	63	0.249746	3968	0.264605
GO:0007267	0.4662	0.876835	cell-cell signaling	149	0.268302	3882	0.264222
GO:0009056	0.9943	0.9954	catabolic process	178	0.23926	3853	0.265533
GO:0007049	0.1604	0.5568	cell cycle	238	0.274135	3793	0.26376
GO:0016192	0.7606	0.977914	vesicle-mediated transport	124	0.257232	3907	0.264599
GO:0019222	0.0747	0.413723	regulation of metabolic process	94	0.287159	3937	0.263828
GO:0048666	0.4291	0.835005	neuron development	35	0.274826	3996	0.264281
GO:0006519	0.9015	0.9954	amino acid and derivative metabolic process	84	0.244943	3947	0.264786
GO:0045893	0.9954	0.9954	positive regulation of transcription, DNA-dependent	48	0.217963	3983	0.264932
GO:0007399	0.9947	0.9954	nervous system development	156	0.244046	3875	0.265191
GO:0006869	0.1988	0.62233	lipid transport	34	0.281012	3997	0.264231
GO:0009790	0.874	0.9954	embryonic development	60	0.248527	3971	0.264612
GO:0006629	0.2599	0.693067	lipid metabolic process	203	0.265399	3828	0.264318
GO:0006464	0.1481	0.5568	protein modification	494	0.272321	3537	0.263262
GO:0009058	0.5137	0.876835	biosynthetic process	261	0.262239	3770	0.26452
GO:0040008	0.63	0.9072	regulation of growth	45	0.266173	3986	0.264352
GO:0048518	0.1139	0.54672	positive regulation of biological process	240	0.276859	3791	0.263582
GO:0008283	0.08846	0.454937	cell proliferation	175	0.275911	3856	0.263849
GO:0050794	0.1624	0.5568	regulation of cellular process	544	0.271437	3487	0.26327
GO:0046907	0.701	0.952302	intracellular transport	184	0.265512	3847	0.264318
GO:0007283	0.4938	0.876835	spermatogenesis	67	0.265924	3964	0.264346
GO:0006950	0.002241	0.06036	response to stress	255	0.284952	3776	0.262983
GO:0050896	0.005186	0.0723189	response to stimulus	243	0.285882	3788	0.262993
GO:0048519	0.1399	0.5568	negative regulation of biological process	257	0.272592	3774	0.263813
GO:0032501	0.0542	0.354764	multicellular organismal process	160	0.276992	3871	0.263851
GO:0006508	0.6069	0.9072	proteolysis	222	0.263137	3809	0.264445
GO:0006091	0.8603	0.9954	generation of precursor metabolites and energy	220	0.25499	3811	0.264914
GO:0002376	0.001687	0.06036	immune system process	210	0.289919	3821	0.262969
GO:0006952	0.004304	0.0723189	defense response	133	0.296211	3898	0.263286
GO:0005975	0.9556	0.9954	carbohydrate metabolic process	150	0.244705	3881	0.265133
GO:0006259	0.6262	0.9072	DNA metabolic process	195	0.263376	3836	0.264423
GO:0007155	0.899	0.9954	cell adhesion	240	0.256754	3791	0.264855
GO:0006457	0.0713	0.413723	protein folding	77	0.276753	3954	0.264131
GO:0048731	0.9094	0.9954	system development	269	0.255952	3762	0.264975
GO:0044237	0.2102	0.6306	cellular metabolic process	353	0.265376	3678	0.264276
GO:0045892	0.03875	0.279	negative regulation of transcription, DNA-dependent	48	0.296731	3983	0.263983
GO:0030154	0.913	0.9954	cell differentiation	359	0.259085	3672	0.264889
GO:0000003	0.2715	0.698143	reproduction	63	0.272478	3968	0.264244
GO:0006810	0.3397	0.759388	transport	227	0.263528	3804	0.264423
GO:0016310	0.02214	0.19926	phosphorylation	205	0.285582	3826	0.263236
GO:0009653	0.9218	0.9954	anatomical structure morphogenesis	144	0.253151	3887	0.264788
GO:0007610	0.6982	0.952302	behavior	72	0.257146	3959	0.264504
GO:0051674	0.5602	0.876835	localization of cell	77	0.262231	3954	0.264414
GO:0050877	0.1412	0.5568	neurological process	218	0.279135	3813	0.263529
GO:0043473	0.1776	0.581236	pigmentation	9	0.3134	4022	0.264263
GO:0009719	0.1292	0.5568	response to endogenous stimulus	95	0.282904	3936	0.263925
GO:0006350	0.002515	0.06036	transcription	464	0.283552	3567	0.261878
GO:0043062	0.9947	0.9954	extracellular structure organization and biogenesis	25	0.19918	4006	0.264779
GO:0009628	0.3586	0.759388	response to abiotic stimulus	40	0.269037	3991	0.264326
GO:0045449	0.006182	0.0723189	regulation of transcription	611	0.279716	3420	0.261631

## Sheet: EA_NS
CELL
GOterm	p-value	q-value	description	Nwithterm	mean_withterm	Nwoutterm	mean_without
GO:0043226	0.4521	0.736883	organelle	204	0.587718	3849	0.588557
GO:0005856	0.04166	0.39577	cytoskeleton	279	0.601568	3774	0.58755
GO:0005622	0.4654	0.736883	intracellular	781	0.58748	3272	0.588762
GO:0005794	0.4199	0.736883	Golgi apparatus	101	0.591074	3952	0.588449
GO:0005783	0.2438	0.736883	endoplasmic reticulum	205	0.596933	3848	0.588066
GO:0031090	0.8622	0.9513	organelle membrane	183	0.575407	3870	0.589134
GO:0005840	0.244	0.736883	ribosome	45	0.60974	4008	0.588276
GO:0005886	0.6494	0.878307	plasma membrane	494	0.585523	3559	0.58893
GO:0005623	0.4504	0.736883	cell	1766	0.59013	2287	0.587268
GO:0005615	0.6058	0.878307	extracellular space	121	0.592726	3932	0.588385
GO:0005634	0.8196	0.9513	nucleus	1250	0.582095	2803	0.591378
GO:0045202	0.2978	0.736883	synapse	38	0.600189	4015	0.588404
GO:0043234	0.1057	0.608475	protein complex	371	0.597659	3682	0.587593
GO:0005829	0.02059	0.39121	cytosol	103	0.618695	3950	0.587728
GO:0005739	0.4206	0.736883	mitochondrion	224	0.594767	3829	0.588149
GO:0005578	0.1281	0.608475	proteinaceous extracellular matrix	90	0.607511	3963	0.588083
GO:0005737	0.9355	0.9513	cytoplasm	635	0.577083	3418	0.590638
GO:0005576	0.9513	0.9513	extracellular region	186	0.572002	3867	0.589309
GO:0005635	0.6934	0.878307	nuclear envelope	40	0.576295	4013	0.588636
MOL
GOterm	p-value	q-value	description	Nwithterm	mean_withterm	Nwoutterm	mean_without
GO:0019899	0.7942	0.939222	enzyme binding	83	0.572989	4460	0.588746
GO:0015075	0.2933	0.701694	ion transporter activity	218	0.596456	4325	0.588055
GO:0003779	0.1448	0.545608	actin binding	76	0.614349	4467	0.588017
GO:0043167	0.5726	0.814274	ion binding	1069	0.586431	3474	0.589081
GO:0005386	0.869	0.974333	carrier activity	100	0.576346	4443	0.58873
GO:0008289	0.1697	0.545608	lipid binding	121	0.604931	4422	0.588007
GO:0004872	0.9804	0.99	receptor activity	452	0.571594	4091	0.590321
GO:0008134	0.8123	0.939222	transcription factor binding	99	0.572339	4444	0.588817
GO:0005488	0.5002	0.740296	binding	247	0.590911	4296	0.588317
GO:0016740	0.3775	0.720575	transferase activity	536	0.591226	4007	0.588088
GO:0003824	0.4908	0.740296	catalytic activity	121	0.589445	4422	0.588431
GO:0030234	0.432	0.740296	enzyme regulator activity	242	0.591652	4301	0.588278
GO:0005102	0.4858	0.740296	receptor binding	194	0.587146	4349	0.588516
GO:0003677	0.932	0.99	DNA binding	481	0.573321	4062	0.59025
GO:0003700	0.984	0.99	transcription factor activity	230	0.564492	4313	0.589736
GO:0015267	0.03417	0.316072	channel or pore class transporter activity	119	0.616534	4424	0.587703
GO:0005509	0.001498	0.055426	calcium ion binding	314	0.611175	4229	0.586771
GO:0008092	0.15	0.545608	cytoskeletal protein binding	45	0.60568	4498	0.588286
GO:0043492	0.3224	0.701694	ATPase activity, coupled to movement of substances	31	0.613916	4512	0.588283
GO:0003676	0.1531	0.545608	nucleic acid binding	166	0.601063	4377	0.58798
GO:0004871	0.08471	0.522378	signal transducer activity	126	0.612913	4417	0.58776
GO:0005515	0.3811	0.720575	protein binding	1460	0.588523	3083	0.588427
GO:0016874	0.3178	0.701694	ligase activity	131	0.595522	4412	0.588248
GO:0005215	0.6865	0.856673	transporter activity	163	0.586182	4380	0.588543
GO:0048037	0.3895	0.720575	cofactor binding	41	0.599254	4502	0.58836
GO:0003774	0.19	0.545608	motor activity	45	0.608513	4498	0.588257
GO:0030528	0.5942	0.814274	transcription regulator activity	191	0.581793	4352	0.58875
GO:0016491	0.04462	0.330188	oxidoreductase activity	220	0.608252	4323	0.587451
GO:0016787	0.02487	0.316072	hydrolase activity	458	0.605286	4085	0.586571
GO:0005198	0.1917	0.545608	structural molecule activity	164	0.603755	4379	0.587885
GO:0003682	0.1355	0.545608	chromatin binding	17	0.611382	4526	0.588372
GO:0009055	0.6563	0.856673	electron carrier activity	28	0.580586	4515	0.588507
GO:0000166	0.02818	0.316072	nucleotide binding	597	0.599901	3946	0.586727
GO:0030246	0.99	0.99	carbohydrate binding	99	0.544898	4444	0.589428
GO:0003723	0.4971	0.740296	RNA binding	157	0.586173	4386	0.58854
GO:0016829	0.6946	0.856673	lyase activity	52	0.573092	4491	0.588636
GO:0008233	0.2195	0.580107	peptidase activity	199	0.597351	4344	0.58805
BIO
GOterm	p-value	q-value	description	Nwithterm	mean_withterm	Nwoutterm	mean_without
GO:0006139	0.1671	0.859371	nucleobase, nucleoside, nucleotide and nucleic acid metabolic process	238	0.603058	3796	0.588504
GO:0051301	0.3873	0.9982	cell division	69	0.59329	3965	0.589294
GO:0008152	0.5948	0.9982	metabolic process	175	0.589649	3859	0.58935
GO:0006996	0.6915	0.9982	organelle organization and biogenesis	300	0.57781	3734	0.590291
GO:0007420	0.8224	0.9982	brain development	28	0.548054	4006	0.589651
GO:0032989	0.6042	0.9982	cellular structure morphogenesis	67	0.579639	3967	0.589527
GO:0019538	0.2247	0.8996	protein metabolic process	152	0.599228	3882	0.588976
GO:0016049	0.282	0.9982	cell growth	44	0.591427	3990	0.58934
GO:0006811	0.7231	0.9982	ion transport	232	0.58658	3802	0.589533
GO:0007165	0.4996	0.9982	signal transduction	895	0.5881	3139	0.589723
GO:0003006	0.6839	0.9982	reproductive developmental process	44	0.564514	3990	0.589637
GO:0007154	0.04657	0.55884	cell communication	34	0.634459	4000	0.588979
GO:0006936	0.5375	0.9982	muscle contraction	32	0.598584	4002	0.589289
GO:0016043	0.4556	0.9982	cellular component organization and biogenesis	211	0.589304	3823	0.589366
GO:0008219	0.9673	0.9982	cell death	208	0.566187	3826	0.590623
GO:0009605	0.9926	0.9982	response to external stimulus	149	0.558428	3885	0.590549
GO:0009607	0.7596	0.9982	response to biotic stimulus	75	0.577405	3959	0.589589
GO:0006412	0.4473	0.9982	translation	118	0.590348	3916	0.589333
GO:0015031	0.4301	0.9982	protein transport	195	0.587888	3839	0.589438
GO:0050789	0.761	0.9982	regulation of biological process	105	0.580311	3929	0.589605
GO:0022613	0.2949	0.9982	ribonucleoprotein complex biogenesis and assembly	43	0.603679	3991	0.589208
GO:0007275	0.189	0.8996	multicellular organismal development	247	0.595778	3787	0.588944
GO:0019725	0.2249	0.8996	cell homeostasis	63	0.608767	3971	0.589055
GO:0007267	0.519	0.9982	cell-cell signaling	149	0.584919	3885	0.589533
GO:0009056	0.004768	0.18468	catabolic process	178	0.622755	3856	0.587821
GO:0007049	0.7931	0.9982	cell cycle	238	0.576649	3796	0.59016
GO:0016192	0.2201	0.8996	vesicle-mediated transport	124	0.597594	3910	0.589102
GO:0019222	0.9143	0.9982	regulation of metabolic process	94	0.562069	3940	0.590014
GO:0048666	0.5593	0.9982	neuron development	35	0.580929	3999	0.589437
GO:0006519	0.1157	0.7674	amino acid and derivative metabolic process	84	0.611605	3950	0.58889
GO:0045893	0.007695	0.18468	positive regulation of transcription, DNA-dependent	48	0.645008	3986	0.588693
GO:0007399	0.006768	0.18468	nervous system development	156	0.616825	3878	0.588258
GO:0006869	0.8509	0.9982	lipid transport	34	0.565368	4000	0.589567
GO:0009790	0.1392	0.770954	embryonic development	60	0.610078	3974	0.58905
GO:0006629	0.6688	0.9982	lipid metabolic process	203	0.58715	3831	0.58948
GO:0006464	0.8406	0.9982	protein modification	494	0.580553	3540	0.590592
GO:0009058	0.4852	0.9982	biosynthetic process	261	0.590966	3773	0.589252
GO:0040008	0.4352	0.9982	regulation of growth	45	0.581227	3989	0.589454
GO:0048518	0.8531	0.9982	positive regulation of biological process	240	0.577371	3794	0.590121
GO:0008283	0.8882	0.9982	cell proliferation	175	0.575071	3859	0.590011
GO:0050794	0.8202	0.9982	regulation of cellular process	544	0.581584	3490	0.590575
GO:0046907	0.3051	0.9982	intracellular transport	184	0.588562	3850	0.589401
GO:0007283	0.5921	0.9982	spermatogenesis	67	0.581048	3967	0.589503
GO:0006950	0.998	0.9982	response to stress	255	0.56279	3779	0.591156
GO:0050896	0.9962	0.9982	response to stimulus	243	0.5618	3791	0.591129
GO:0048519	0.8595	0.9982	negative regulation of biological process	257	0.578578	3777	0.590097
GO:0032501	0.954	0.9982	multicellular organismal process	160	0.573439	3874	0.59002
GO:0006508	0.422	0.9982	proteolysis	222	0.591113	3812	0.589261
GO:0006091	0.1279	0.7674	generation of precursor metabolites and energy	220	0.604186	3814	0.588508
GO:0002376	0.9982	0.9982	immune system process	210	0.557705	3824	0.591101
GO:0006952	0.9959	0.9982	defense response	133	0.553038	3901	0.590601
GO:0005975	0.03109	0.447696	carbohydrate metabolic process	150	0.619761	3884	0.588189
GO:0006259	0.3696	0.9982	DNA metabolic process	195	0.590916	3839	0.589284
GO:0007155	0.1207	0.7674	cell adhesion	243	0.600331	3791	0.58866
GO:0006457	0.8966	0.9982	protein folding	77	0.571713	3957	0.589706
GO:0048731	0.1157	0.7674	system development	269	0.598522	3765	0.588708
GO:0044237	0.7198	0.9982	cellular metabolic process	353	0.587189	3681	0.589571
GO:0045892	0.9443	0.9982	negative regulation of transcription, DNA-dependent	48	0.550831	3986	0.589827
GO:0030154	0.09844	0.7674	cell differentiation	359	0.595799	3675	0.588734
GO:0000003	0.676	0.9982	reproduction	63	0.577802	3971	0.589546
GO:0006810	0.6812	0.9982	transport	227	0.589756	3807	0.589339
GO:0016310	0.9816	0.9982	phosphorylation	205	0.564367	3829	0.590701
GO:0009653	0.1041	0.7674	anatomical structure morphogenesis	144	0.601835	3890	0.588901
GO:0007610	0.2636	0.9982	behavior	72	0.601093	3962	0.58915
GO:0051674	0.4646	0.9982	localization of cell	77	0.594214	3957	0.589268
GO:0050877	0.9007	0.9982	neurological process	218	0.571728	3816	0.59037
GO:0043473	0.8338	0.9982	pigmentation	9	0.527956	4025	0.5895
GO:0009719	0.8832	0.9982	response to endogenous stimulus	95	0.565453	3939	0.589939
GO:0006350	0.9977	0.9982	transcription	464	0.566246	3570	0.592367
GO:0043062	0.02663	0.447696	extracellular structure organization and biogenesis	25	0.656924	4009	0.588941
GO:0009628	0.6525	0.9982	response to abiotic stimulus	40	0.58391	3994	0.589417
GO:0045449	0.992	0.9982	regulation of transcription	611	0.571409	3423	0.592567
