# Supplementary material for: Evolutionary Processes Acting on Candidate cis-Regulatory Regions in Humans Inferred from Patterns of Polymorphism and Divergence
Source: PLoS Genet. 2009 Aug 7;5(8):e1000592. doi: 10.1371/journal.pgen.1000592 (PMC2714078; doi:10.1371/journal.pgen.1000592)
Supplement: Table S14 — Summary statistics for the distribution of the log of the neutrality index for simulated human-mouse conserved sequences versus unfiltered sequences. (0.04 MB PDF) [file pgen.1000592.s030.pdf]

**Table S14.** Summary statistics for the distribution of the log of the neutrality index for HMCS versus unfiltered simulated data across 10,000 nonparametric bootstrap draws.

| Data       | Min.     | 1 <sup>st</sup> Quartile | Median  | Mean    | 3 <sup>rd</sup> Quartile | Max.    |
|------------|----------|--------------------------|---------|---------|--------------------------|---------|
| HMCS       | -4.02500 | -0.64250                 | 0.08701 | 0.08074 | 0.78850                  | 3.66400 |
| Unfiltered | -4.51100 | -0.69310                 | 0.00000 | 0.01148 | 0.71560                  | 4.10500 |
